## LRScf: Improving Draft Genomes Using Long Noisy Reads

2

Mao Qin<sup>1,\*</sup>, mqin@outlook.com

4 Shigang Wu<sup>1</sup>, 495402193@qq.com

Alun Li<sup>1</sup>, 343010781@qq.com

6 Fengli Zhao<sup>1</sup>, zw301987@163.com

Hu Feng<sup>1</sup>, fenghu01@126.com

8 Lulu Ding<sup>1</sup>, lulu.ding1@outlook.com

Yuxiao Chang<sup>1</sup>, changyuxiao@cass.cn

10 Jue Ruan<sup>1,\*</sup>, ruanjue@caas.cn

12 <sup>1</sup> Genome Analysis Laboratory of the Ministry of Agriculture, Agricultural Genomics Institute  
at Shenzhen, Chinese Academy of Agricultural Sciences, Shenzhen, Guangdong 518124,  
14 China.

16 \* To whom correspondence should be addressed.

18

20

22

## 24 Abstract

26 **Background:** The advent of Third Generation Sequencing (TGS) technologies opens the door to improve genome assembly. Long reads are promised to enhance the quality of fragmental draft assemblies constructed from Next Generation Sequencing (NGS) technologies. To date, a few of algorithms, *i.e.*, SSPACE-LongRead, OPERA-LG, SMIS, npScarf, DBG2OLC, Unicycler, and LINKS, have been released that are capable of improving draft assemblies. However, hybrid assembly on large genomes is still challenging.

32 **Results:** We develop a scalable and computationally efficient scaffolder, Long Reads Scaffolder (LRScaf), that is capable of boosting assembly contiguity to a large extent using long reads. In our experiment, our method significantly improves the contiguity of human draft assemblies, increasing the NG50 value of CHM1 from 127.5 Kb to 10.4 Mb using 20-fold coverage PacBio dataset and the NG50 value of NA12878 from 115.7 Kb to 17.4 Mb using 35-fold coverage Nanopore dataset. The run time for the scaffolding procedure using LRScaf is the shortest in all cases of our experiment. Compared with the run time of SSPACE-LongRead, LRScaf is faster 300 times for *S. cerevisiae* and 2,300 times for *D. melanogaster*. The peak RAM of LRScaf, by contrast, is more efficient than LINKS in our test. For the rice case, the peak RAM of LINKS (877.72 Gb) is about 196 times higher than LRScaf. For the experiment of human assembly, the peak RAM of LINKS is beyond the capacity of system memory (1 Tb) whereas LRScaf takes 20.28 and 41.20 Gb on CHM1 and NA12878 datasets.

44 **Conclusions:** The new method, LRScaf, yields the best or at least moderate contiguity and accuracy of scaffolds in the shortest run time compared with the state-of-the-art methods.

Furthermore, it offers a new opportunity for the hybrid assembly of large genomes.

46 **Keywords:** Assembly, Scaffolding, SMRT, ONT, Long Reads,

48

## Background

50 With the advent of Next Generation Sequencing (NGS) technologies, the genomics community  
has made significant contributions to *de novo* assembling genomes. Despite that many studies  
52 and tools are aimed at reconstructing NGS data into complete *de novo* assemblies of genomes,  
this goal is difficult to achieve because of intrinsic limitation of NGS data, *i.e.*, read lengths are  
54 shorter than most of the repetitive sequences [1]. The existence of repeats makes it difficult to  
reconstruct complete genomes instead of generating a large set of contiguous sequences  
56 (contigs) even when the sequencing coverage is high [2]. Thus, attention is focused on the  
so-called genomic scaffolding procedure, which aims at reducing the number of contigs by  
58 using fragments of moderate lengths whose ends are sequenced (double-barreled data) [3,4].  
Nevertheless, major genomic regions still hinder genomic assemblies because of, primarily,  
60 large-size repeat and low coverage. In response, Third Generation Sequencing (TGS)  
technologies have been developed. TGS sheds light on different alternatives to solve genome  
62 assembly problems by offering very long reads, *e.g.*, the Single Molecule Real Time (SMRT)  
sequencing technology of Pacific Biosciences<sup>®</sup> (PacBio) delivers read lengths of up to 50 Kb [5]  
64 and the nanopore sequencing technology of Oxford Nanopore Technologies<sup>®</sup> (ONT) delivers  
read lengths which are greater than 800 Kb [6]. These long reads suffer from high sequencing  
66 error rates, however, which necessitates high coverage during the genome assembly [7]. In

addition, TGS technologies have a higher cost per base than NGS methods. Consequently, long  
68 reads are more commonly used for scaffolding draft assemblies generated from NGS data than  
for *de novo* assembly [8].

70 The process of genome assembly is typically divided into two major steps. The first step is to  
piece overlapping reads together into contigs which is commonly done using the *de Bruijn* or  
72 overlap graph [1]. The second step is to assemble scaffolds, consisting of ordered sequences of  
oriented contigs with estimated distances between them. Scaffolding, which was first  
74 introduced by Huson [3], is a critical part of the genome assembly process, especially for NGS  
data. Yet, scaffolding is a research area that remains largely open because of the NP-hard  
76 complexity [9]. By using paired-end and/or mate-pair reads linking information, a number of  
standalone scaffolders, *e.g.* Bambus [4], MIP [10], Opera [11], SCARPA [12], SOPRA [13],  
78 SSPACE [14], BESST [15], and BOSS [16], have been developed. Nevertheless, a recent  
comprehensive evaluation showed that scaffolding was still computationally intractable and  
80 required better quality large insert-size pair read libraries than presently available [17]. As TGS  
technologies are likely to offer longer reads than the lengths of the most common repeats, these  
82 technologies are capable of drastically reducing and solving the complexity caused by repeats.  
Considered the pros and cons of NGS and TGS data, a hybrid assembly approach that  
84 assembled draft genomes using TGS data was proposed [18]. The core strategy of this approach  
is: 1) long reads are mapped onto the contigs using a long-read mapper (*e.g.* BLASR [19] or  
86 minimap [20,21]); 2) examining alignment information, long reads that span more than one  
contig are identified and their linking relationship is stored in a data structure; 3) the last step is  
88 to clean up the structure by removing redundant and error-prone links, calculate distances

between contigs, and build scaffolds using links information.

90 Based on the hybrid assembly strategy, AHA [18] was the first standalone hybrid scaffolder  
and was part of the SMRT analysis software suite. As AHA was designed for small genomes  
92 and had limitations on the input data, it was not suitable for large genomes. To ensure that  
scaffolds were as contiguous as possible, AHA performed 6 iterations by default, thus increasing  
94 the run time. SSPACE-LongRead [22] produced the final scaffolds in a single iteration and,  
therefore, had a significantly shorter run time than AHA. Nevertheless, SSPACE-LongRead  
96 had somewhat lower assembly accuracy than AHA. Despite being designed for large  
eukaryotic genomes, SSPACE-LongRead was unpractical because of its intensive run time.  
98 LINKS [23] opened a new door to build linking information between contigs. The algorithm  
used the long interval nucleotide K-mer without computational alignment and reads correction  
100 step, but its memory usage was a concern. OPERA-LG [24] provided an exact algorithm for  
large and repeat-rich genomes. Its main limitation was that it required significant mate-pair  
102 information to constrain the scaffold graph and report an optimized result. OPERA-LG was not  
directly designed for TGS data, and to construct scaffold edges and link contigs together into  
104 scaffolds, OPERA-LG needed to be modified by simulated and grouped mate-pair relationship  
information from long reads. Recent studies, such as SMIS (Available from  
106 <http://www.sanger.ac.uk/science/tools/smis>), npScarf [25], DBG2OLC [26] and Unicycler [27],  
have been reported based on the hybrid assembly strategy. However, these tools have not been  
108 thoroughly assessed for different genome sizes, especially large genomes.

Here we present a Long Reads Scaffolder (LRScaf) to improve draft genomes using TGS  
110 data. The input to LRScaf is given by a set of contigs and their alignments over SMRT or ONT

long reads. We compare our method with the state-of-the-art tools on real and synthetic datasets.

112 All the methods tested improve the contiguity of pre-assembled genomes. Our method yields  
the best assembly metrics and contiguity for pre-assembled genomes of *E. coli*, *S. cerevisiae*, *D.*  
114 *melanogaster*, and *H. sapiens*. More importantly, however, our method consistently returns the  
most accurate scaffolds and has the shortest run time. Especially, LRScf significantly  
116 improves the contiguity of human draft assemblies, increasing the NG50 value of CHM1 from  
127.5 Kb to 10.4 Mb using 20-fold coverage PacBio dataset and the NG50 value of NA12878  
118 from 115.7 Kb to 17.4 Mb using 35-fold coverage Nanopore dataset. We thus show that LRScf  
is a valuable tool for improving draft assemblies in a cost-effective way.

120

## Results and discussion

122 We performed in-depth analysis on five species, *i.e.*, *E. coli*, *S. cerevisiae*, *D. melanogaster*, *O.*  
*sativa*, and *H. sapiens*, to test and compare the performance of LRScf with that of SMIS,  
124 npScarf, DBG2OLC, Unicycler, SSPACE-LongRead, LINKS, and OPERA-LG. The details of  
datasets are provided in Table 1 and in the Methods section. The NGS datasets for *E. coli* and  
126 *S. cerevisiae* are real with 600 and 105 -fold coverages respectively, where the NGS datasets  
for *D. melanogaster* and *O. sativa* were synthesized using pIRS [28] with 50-fold coverage.  
128 The real reads for the two small genomes (*E. coli* and *S. cerevisiae*) were first cleaned and  
then used to construct draft assemblies using SOAPdenovo2 [29] and SPAdes [30]. The  
130 synthetic reads for the two large genomes (*D. melanogaster* and *O. sativa*) were directly used  
to build draft assemblies using SOAPdenovo2. The draft assemblies of two human lines  
132 CHM1 [31] and NA12878 [32] were used to test the performances of all scaffolders for large

genomes using the PacBio and Nanopore datasets. The statistics of draft assemblies are shown  
134 in Table 2. Results and assembly metrics obtained after the scaffolding procedure are  
displayed in Tables 3 and 4.

136

### Draft genome assemblies

138 We used SPAdes to construct draft assemblies for two small genomes (*E. coli* and *S. cerevisiae*)  
with the “careful” parameter option. Draft assemblies for these two small genomes were also  
140 constructed using SOAPdenovo2. In addition, SOAPdenovo2 was used to construct draft  
assemblies for *D. melanogaster* and *O. sativa*, whose synthetic reads were available. We used  
142 the optimal k-mer values for the draft assemblies constructed by SOAPdenovo2 with 51 (*E.*  
*coli*), 59 (*S. cerevisiae*), 61 (*D. melanogaster*), and 73 (*O. sativa*). These values were selected  
144 based on assembled genome size, number of contigs, and genome contiguity.

The statistics of draft assemblies for *E. coli*, *S. cerevisiae*, *D. melanogaster*, *O. sativa*, and  
146 *H. sapiens* are shown in Table 2. For *E. coli*, the draft-genome size obtained using  
SOAPdenovo2 is 4.6 Mb distributed over 728 contigs, yielding an assembled genome fraction  
148 of 98 % and an N50 value of 40.0 Kb. SPAdes yields a draft-assemblies size of 4.6 Mb with 242  
contigs, a genome fraction of 98 %, and an N50 value of 133.2 Kb. The draft-assemblies size  
150 generated by ABySS is 5.2 Mb with 69 contigs, a genome fraction of 110 %, and an N50 value  
of 177.6 Kb. For *S. cerevisiae*, the draft-genome size obtained using SOAPdenovo2 is 12.1 Mb  
152 with 6,961 contigs, providing a genome fraction of 99 % and an N50 value of 20.0 Kb. SPAdes  
generates a draft-assemblies size of 11.8 Mb with 2,254 contigs, yielding a genome fraction of  
154 97 % and an N50 value of 107.9 Kb. The draft-assemblies size constructed by Celera Assembly

is 15.0 Mb with 6,953 contigs, a genome fraction of 124 %, and an N50 value of 49.2 Kb. For *D.*  
156 *melanogaster*, the draft-assemblies size constructed by SOAPdenovo2 is 118.1 Mb with 45,480  
contigs, a genomic fraction of 98 %, and an N50 value of 111.0 Kb. The draft-genome size for  
158 *O. sativa* is 346.2 Mb and it contains 257,801 contigs, yielding a genomic fraction of 92 % and  
an N50 value of 19.0 Kb. The size of the draft genome of CHM1 is 2.8 Gb distributed over  
160 40,906 contigs, and it has a genomic fraction of 93 % and an N50 value of 140.0 Kb where the  
draft-assemblies size of NA12878 is 3.1 Gb with 858,918 contigs, yielding a genome fraction  
162 of 102 % and an N50 value of 179.8 Kb.

The depth of coverage is an important factor in *de novo* genome assembly. The genome  
164 contiguity and completeness obtained are not only determined by the depth of coverage,  
however, but also by the method's ability to overcome complex genome structures, *e.g.*  
166 repetitive regions. *E. coli* is the smallest genome and has the highest coverage (more than  
600-fold of NGS reads) among the genomes included in this study. However, the assembly  
168 contiguity is still fragmental. As the genome gets larger and more complex, draft assemblies  
become increasingly fragmental unless auxiliary technologies are included in the assembly  
170 process. Consequently, the inclusion of large insert-size mate-pair libraries, Hi-C [33],  
optical-mapping data [34] and long reads is important to overcome large repeats and to assist  
172 the scaffolding procedure.

#### 174 Scaffolding on SMRT long reads

In this study, we used long reads of SMRT datasets for *E. coli*, *S. cerevisiae*, *D. melanogaster*, *O.*  
176 *sativa*, and *H. sapiens* to assess the performances of seven state-of-the-art scaffolders (*i.e.*,



SSPACE-LongRead, LINKS, OPERA-LG, SMIS, npScarf, Unicycler, and DBG2OLC) and our  
178 LRScf (See Table 1). The median lengths of SMRT long reads for 5 organisms are 8.7 Kb, 4.6  
Kb, 19.6 Kb, 3.4 Kb, and 1.6 Kb, respectively. And the longest reads are 41.3 Kb, 27.6 Kb, 33.6  
180 Kb, 24.4 Kb, and 208.6 Kb, respectively. The coverages of SMRT long reads are 20.1-fold (*E.*  
*coli*), 20.7-fold (*S. cerevisiae*), 18.9-fold (*D. melanogaster*), 11.7-fold (*O. sativa*), and 20.0-fold  
182 (*H. sapiens*). The distributions of read length show that the SMRT long reads approximate  
normal distributions (See Suppl. Fig. 1). The SMRT long reads of *D. melanogaster* were  
184 filtered for the FALCON assembler [35], which resulted in an increased average read length.  
QUAST [36] was used to assess draft assemblies after the scaffolding procedure. The released  
186 version 4.5 of QUAST was failed to assess human assemblies, and, therefore, we used the  
dev-5.0 version to evaluate the corresponding assembly metrics.

188 All scaffolders reduce the number of contigs and improve assemblies contiguity (See Table 3  
and Suppl. Tables 1 and 2). Whereas SSPACE-LongRead, SMIS, Unicycler, and LRScf  
190 reconstruct the genome for *E. coli* into a complete single chromosome, LINKS, OPERA-LG,  
npScarf, and DBG2OLC fail to do that. In addition, Unicycler significantly reduces the  
192 numbers of contigs. For the 1, 5, and 10 -fold coverages, the performances of scaffolders tested  
show similar results on the 20-fold coverage where the assemblies contiguity of  
194 SSPACE-LongRead, SMIS, Unicycler, and LRScf are better than that of LINKS, OPERA-LG,  
npScarf, and DBG2OLC (See Suppl. Tables 1 and 2). For *S. cerevisiae*, the npScarf method  
196 yields the best NG50 value (665.8 Kb) and Unicycler generates the best NA50 value (284.1 Kb).  
SSPACE-LongRead, LINKS, OPERA-LG, npScarf, and LRScf yield the longest sequence  
198 (1.0 Mb). For the 1, 5, and 10 -fold coverages, SSPACE-LongRead yields the best assemblies

contiguity (NG50) in 5 out of 6 cases and OPERA-LG, npScarf, and LRScaf yield the best  
200 NG50 in 1 out of 6 cases (See Suppl. Table 1). Based on draft assemblies generated by  
SOAPdenovo2 using 20-fold coverage, SSPACE-LongRead and LRScaf yield the best NG50  
202 and NA50 value respectively and generate the longest sequence (See Suppl. Table 2). For *D.*  
*melanogaster*, SSPACE-LongRead yields the best NG50 value (6.6 Mb) and LRScaf with  
204 BLASR produces the best NA50 value (5.2 Mb). SSPACE-LongRead and LRScaf construct the  
longest sequence of 19.6 Mb. For *O. sativa*, DBG2OLC significantly reduces the number of  
206 sequences and produces the best NG50 value (94.5 Kb) and NA50 value (64.9 Kb), and the  
longest sequence (794.7 Kb). SSPACE-LongRead is excluded from this assessment because it  
208 exceeds the 3 weeks' run time limit. For *H. sapiens* CHM1, LRScaf with minimap2 yields the  
best NG50 value (10.4 Mb) and NA50 value (10.7 Mb), and the longest sequence (45.0 Mb).  
210 The run time of SSPACE-LongRead, SMIS, and npScarf exceeds the time limit, and LINKS  
exceeds our system's memory capacity of 1 Tb. Thus, these scaffolders are excluded from the  
212 test on the *H. sapiens* CHM1 genome. As evident from our experiments, the run time and the  
memory usage for these scaffolders become significant concerns for the large and complex  
214 genomes. DBG2OLC is recommended to use SparseAssembler (Available from:  
<https://github.com/yechengxi/SparseAssembler>) to construct draft assemblies for hybrid  
216 assembly. This might be the reason for the assembly genome size generated by DBG2OLC is  
smaller than what the other scaffolders yield, especially for the *H. sapiens*. To summarize,  
218 LRScaf yields the best or, at least, moderate assembly metrics when compared with other  
scaffolders on SMRT long reads.

220

## Scaffolding on ONT long reads

222 We used the ONT long reads datasets for *E. coli*, *S. cerevisiae*, and *H. sapiens* to assess the  
performances of scaffolders tested (See Table 4). Because of lack of NGS data, OPERA-LG  
224 and Unicycler were excluded from this assessment. For the two small genomes, the ONT  
long-reads datasets were published in LINKS, including 3 of *E. coli* (FULL, ALL and RAW  
226 datasets with 4.7, 34.0, and 66.5 -fold coverages, respectively) and 2 of *S. cerevisiae*  
(NANOCORR and RAW datasets with 43.6 and 198.2 -fold coverages). We used the *H. sapiens*  
228 NA12878 dataset with 35.0-fold coverage as the large genome for this test. The best median  
and longest length of reads are 6.1 Kb and 1.5 Mb respectively (See Table 1). The distributions  
230 of read length show that ONT long reads approximate bimodal distributions with a long tail  
(See Suppl. Fig. 2). The median length of ONT reads is approximately equal to that of SMRT,  
232 but the longest length of ONT reads is significantly longer than that of SMRT datasets. QUASt  
(Version 4.5) was used to assess draft assemblies and scaffolded assemblies for *E. coli* and *S.*  
234 *cerevisiae*. And QUASt (Dev-5.0 version) was used to evaluate the corresponding assembly  
metrics for *H. sapiens*.

236 All scaffolders decrease the number of contigs and improve genome contiguity (See Table 4).  
The number of contigs for the *E. coli* draft assemblies is 69 with an NG50 value of 179.7 Kb.  
238 For the FULL dataset, LRScf with BLASR yields the best NG50 value (921.6 Kb) and NA50  
value (485.2 Kb), and the longest sequence (1.1 Mb). SMIS generates the best NG50 value  
240 (992.2 Kb) and NA50 value (618.4 Kb), and the longest sequence (1.2 Mb) for the ALL dataset  
where LRScf with BLASR yields similar performance (NG50: 922.5 Kb, NA50: 616.5 Kb,  
242 and the longest sequence 1.1 Mb). Whereas SMIS produces the best numbers for the RAW

dataset (NG50: 928.1 Kb, NA50: 879.1 Kb, and the longest sequence 1.2 Mb), LRScaf with  
244 BLASR yields very similar metrics. For *S. cerevisiae*, the number of contigs for the draft  
assemblies is 6,953 with an NG50 value of 58.8 Kb. For the NANOCORR dataset, the npScarf  
246 method yields the best NG50 value and the longest sequence (559.4 Kb and 1.5 Mb,  
respectively), and SMIS produces the best NA50 value (250.7 Kb). The npScarf scaffolder also  
248 produces the best metrics (NG50: 578.3 Kb, NA50: 250.0 Kb, and the longest sequencing 1.6  
Mb) for the RAW dataset. For the NA12878 dataset, LRScaf with minimap2 significantly  
250 improves the contiguity of the draft assemblies and yields the best NG50 and NA50 values  
(17.4 Mb and 13.6 Mb, respectively). LRScaf with BLASR produces the longest sequence  
252 (71.6 Mb). All the other scaffolders are similar to the assessment using the PacBio dataset and  
exceed either the time limit (3 weeks) or the memory capacity of system (1 Tb). In addition,  
254 DBG2OLC is not successful to scaffold draft assemblies generated by DISCOVAR. This is as  
expected where DBG2OLC is recommended to use SparseAssembler as its NGS Assembler for  
256 hybrid assembly. Compared with the results obtained using the SMRT datasets, none of the  
scaffolders could assemble *E. coli* into a single chromosome and the contiguity of *S. cerevisiae*  
258 is more fragmented. Although all scaffolders show certain improvement in our experiment, the  
application of the ONT data is still challenging. A recent study showed that the NA12878  
260 genome was assembled with an NG50 value of about 6.5 Mb using pure 35-fold ONT data [6].  
Our experiments, however, show that it is possible to significantly improve assembly contiguity  
262 to 17.4 Mb where it is similar to the PacBio human case. To summarize, LRScaf yields either  
the best or similar assembly metrics using long reads of ONT compared with the other  
264 scaffolders.

## 266 Computational performance and accuracy analysis

The assembly metrics are undoubtedly the most concerning matters to biologists and  
268 bioinformaticians. Nevertheless, from a practical point of view, the run time limits software  
applications. SSPACE-LongRead and OPERA-LG use BLASR as their default TGS mapper  
270 for construction of joints between contigs. The npScarf software uses BWA [37] as its default  
mapper. LINKS, SMIS, Unicycler, and DBG2OLC use its built-in algorithms to build joints  
272 between contigs. To enable a direct comparison with SSPACE-LongRead and OPERA-LG, our  
LRScarf supports BLASR. Nevertheless, it also supports a faster TGS mapper minimap  
274 (Versions 1 and 2), which enables a significant reduction for the total run time of the scaffolding  
procedure. LRScarf is the fastest scaffolder for all the cases using SMRT long reads. LRScarf  
276 reduces the run time more than 300 times compared with SSPACE-LongRead and more than  
3,900 times compared with Unicycler for *S. cerevisiae* (See Table 3). As the genome gets larger,  
278 the advantage of shorter run time becomes more important. In *D. melanogaster*, LRScarf is  
2,300 times faster than SSPACE-LongRead and 2,550 times faster than SMIS. In *O. sativa*,  
280 LRScarf is 1,276 times faster than SIMS. We have no number on how much LRScarf is faster  
than SSPACE-LongRead because the latter exceeds the time limit (3 weeks). For *H. sapiens*,  
282 SSPACE-LongRead, SMIS, and npScarf exceed the time limit (3 weeks). For the ONT datasets,  
LRScarf is also the fastest scaffolder. LRScarf is more than 131 times faster than  
284 SSPACE-LongRead on the FULL dataset for *E. coli*. As the dataset grows larger, the advantage  
becomes more significant. LRScarf is 714 times faster on the ALL dataset for *E. coli*, 603 times  
286 faster on the RAW dataset for *E. coli*, and 1,408 times on the RAW dataset for *S. cerevisiae* than

SSPACE-LongRead. LINKS skips the all-to-all alignment step and is faster than  
288 SSPACE-LongRead in all cases. Nevertheless, the memory usage of LINKS is of concern and it  
might be alleviated by further improvement of the data-structure. Although the peak RAM  
290 usage for LRScaf is higher than that of OPERA-LG on small genomes, our experiments show  
that the memory usage of LRScaf is practical even for large and complex genomes where the  
292 peak RAM for LRScaf is not over 30 Gb on CHM1 PacBio dataset and 80 Gb on NA12878  
ONT dataset.

294 Reducing the number of misassemblies is important because misassemblies are likely  
misinterpreted as true genetic variations [38,39]. For the SMRT datasets, SSPACE-LongRead  
296 and LRScaf yield the fewest number of misassemblies (1) among the scaffolders based on draft  
assemblies for *E. coli* generated by SOAPdenovo2 (See Suppl. Table 2). Unicycler produces the  
298 fewest number of misassemblies for *E. coli* (1) and *S. cerevisiae* (17) based on draft assemblies  
constructed by SPAdes where LINKS and npScaf yields the maximum number of  
300 misassemblies for *E. coli* (13) and *S. cerevisiae* (105) respectively (See Table 3). LRScaf yields  
the fewest number of misassemblies for *D. melanogaster* (15) and *O. sativa* (455) where  
302 DBG2OLC and OPERA-LG produce the maximum number of misassemblies for *D.*  
*melanogaster* (2,393) and *O. sativa* (2,604) respectively (See Table 3). For *H. sapiens*, we have  
304 no number on how many the number of misassemblies for the other scaffolders because all of  
them are failed to scaffold the draft assemblies. For the ONT datasets, the draft assemblies for *E.*  
306 *coli*, *S. cerevisiae*, and *H. sapiens* contain 5, 19, and 336 misassembled contigs, respectively,  
and none of the scaffolders significantly increases the number of misassemblies (See Table 4).  
308 LRScaf with minimap2 outputs the fewest number of misassemblies on the *E. coli*, *S. cerevisiae*

(RAW data). LRScf with minimap outputs the fewest number of misassemblies on *H. sapiens*.  
310 SMIS yields the fewest number of misassemblies for the *S. cerevisiae* NANOCORR dataset.  
SSPACE-LongRead yields the maximum number of misassemblies (147) on the RAW dataset  
312 for *S. cerevisiae*. In summary, LRScf introduces a new strategy for keeping valid alignments  
(See Methods section) and produces fewer misassemblies than most of the other scaffolders.  
314 Moreover, LRScf with minimap2 significantly reduces the run time of scaffolding procedure  
without increasing the number of misassemblies. Based on the SMRT and ONT performances,  
316 we recommend that LRScf is used with BLASR on small genomes and with minimap on large  
genomes.

318

## Conclusion

320 In this work, we present a novel program for scaffolding draft assemblies using noisy TGS long  
reads information and compare our algorithm with the previous methods. The majority of the  
322 draft assemblies constructed using NGS data is fragmented and influenced by repeats. The  
disadvantage of long reads is that they contain significantly more errors than first- and second-  
324 generation sequencing technologies. Nevertheless, we successfully use long reads to build links  
between contigs, overcome repetitive regions, and improve genome contiguity. We propose a  
326 new strategy to filter inaccurate alignments so that these false alignments do not propagate  
through the scaffolding process. For the assessments on SMRT long-read datasets covering 5  
328 organisms, our method shows significant improvements over the state-of-the-art scaffolders.  
The primary benefits of LRScf over these scaffolders are that it yields the fewer number of  
330 misassemblies and reduces the run time, yet it retains the best or, at least, average assembly

metrics. These improvements are especially useful for large and complex genomes. For the  
332 assessments on ONT long-read datasets for 3 organisms, our method shows significant  
improvements over the previous algorithms. Our method keeps the best or, at least, average  
334 assembly metrics and the shortest run time. In addition, our method has the fewest number of  
misassemblies in most of the cases. As studied genomes keep getting larger and more complex,  
336 the run time and the memory usage for the analysis software are becoming increasingly  
important to biologists and bioinformaticians. Our method is designed with reduction of the run  
338 time and the memory usage in mind and is, thus, much faster than other scaffolders and requires  
only moderate memory usage. Identification of misassembled contigs is also important,  
340 however, because any misassembled sequences are propagated into the next step during  
biological analysis. Most state-of-the-art scaffolders lack functions for identification of  
342 misassembled contigs. In addition, misassemblies might be introduced during the scaffolding  
procedure. Consequently, to limit the number of misassembled scaffolds, our method  
344 incorporates a validation algorithm that checks the links information between contigs. As  
checking and correcting misassemblies from draft assemblies is important, we are planning to  
346 use long read information to achieve and integrate these functions in a future version of  
LRScf.

348 In the past decade, worldwide collaboration has led to several projects, aiming at improving  
the understanding of species biology and evolution. Examples of such projects are the i5k [40],  
350 which provides the genomes of 5,000 species of insects, and the Bird 10,000 Genomes (B10K)  
[41]. However, a substantial fraction of genomes with short contiguity hinder downstream  
352 analysis. Our result shows that TGS data is capable of effectively improving draft assemblies



and LRScf is a valuable tool for improving draft assemblies in a cost-effective way.

354

## Methods

### 356 Alignment of TGS long reads

LRScf was designed to separate the mapping and scaffolding procedures. Hence, during the  
358 mapping procedure, we set the number of processes to 48 and kept the default values for all  
other parameters using BLASR and minimap (Version 1 and 2). LRScf supports the default  
360 alignment format of these mappers.

### 362 Validating alignment

The high error rate is a serious disadvantage of TGS long reads. Thus, a large fraction of the  
364 alignments is incorrect and needs to be filtered out. We developed a validation model to validate  
each alignment (See Figure 1). The model partitioned each long read into three regions (R1, R2,  
366 and R3) separated by two points (P1 and P2). Considered the alignment start (S) and end (E)  
loci in the contig, there were six different combination sets in  $R$ , *i.e.*,  $R \in \{(S \text{ in } R1, E \text{ in } R1),$   
368  $(S \text{ in } R1, E \text{ in } R2), (S \text{ in } R1, E \text{ in } R3), (S \text{ in } R2, E \text{ in } R2), (S \text{ in } R2, E \text{ in } R3),$   
 $(S \text{ in } R3, E \text{ in } R3)\}$ . We also defined the distal length of a contig to the start or end alignment  
370 loci as the over-hang length of the contig. Taken both the alignment region and the over-hang  
length into account, the valid alignment satisfied: 1) (S in R1, E in R1) with the right over-hang  
372 length not exceeding the constraints; 2) (S in R1, E in R2) with the right over-hang length not  
exceeding the constraints; 3) (S in R2, E in R2) with the two end over-hang length not  
374 exceeding the constraints; 4) (S in R2, E in R3) with the left over-hang length not exceeding the

constraints; 5) (S in R3, E in R3) with the left over-hang length not exceeding the constraints.

376 An alignment was filtered out if a long read was entirely covered by a contig (S in R1, E in R3),  
*i.e.*, the contig contained the long read. After this procedure, the remaining alignments were  
378 considered to be valid for the scaffolding procedure.

### 380 Repeat identification

Repetitive sequences complicate the genome assembly. Thus, such sequences were masked in  
382 our approach. First, based on the uniform coverage of TGS data, we identified and removed  
repeats by the coverage of reads. In the calculation of reads coverage, long reads that covered  
384 the entire contig were counted. Then we computed the mean coverage and the standard  
deviation among the set of contigs. Any contig coverage that was larger than the threshold  
386 coverage, which was set to  $\mu_{cov} + 3 \times s.d._{cov}$ , was considered to be a repeat and the  
corresponding contig was removed from the next step of the analysis.

388

### Constructing links and edges

390 A long read may have multiple mappings because of repeats and high sequencing error rate.  
Figure 2 describes how links are built between contigs from the validated alignments. This  
392 process had two constraints on orientation and distance. Four strand combination sets  $S$  were  
used between contigs to constrain orientation, *i.e.*,  $S \in \{s_1: (+, +), s_2: (+, -), s_3: (-, +),$   
394  $s_4: (-, -)\}$ . We defined the orientation between contigs as  $O(c_i, c_j) = \max(s)$ . The  
probability that the internal distance  $e$  between two contigs lies outside the range  $[\mu_{is} - 3 \times$   
396  $\sigma_{is}, \mu_{is} + 3 \times \sigma_{is}]$  was less than 5%, because  $e$  approximately follows a normal distribution

$N(\mu_{is}, \sigma_{is})$ . If  $e$  lay outside the range  $[\mu_{is} - 3 \times \sigma_{is}, \mu_{is} + 3 \times \sigma_{is}]$ , it was considered to be  
398 abnormal and the linking information was removed. Any long reads linking a contig to itself at  
different loci were also removed. After validating two constraints on links between contigs, we  
400 introduced an edge to represent a bundle of links that jointed two contigs using quadruple  
parameters  $E(c_i, c_j) = (n, \overline{\mu_{is}}, \overline{\sigma_{is}}, o)$ . Here,  $n$  was the number of remaining links considered  
402 as the weight of the edge,  $\overline{\mu_{is}}$  was the mean internal distance for the remaining links,  $\overline{\sigma_{is}}$  was  
the standard deviation of the internal distances for the remaining links, and  $o$  was the  
404 orientation strand between contigs.

#### 406 Graph construction and simplification

In this step, LRScaf constructed a scaffold graph  $G(V, E)$  similar to the string graph  
408 formulation. The vertex set  $V$  represented the end of the contigs and the edge set  $E$  represented  
the linkage implied by long reads between ends of two contigs with weight and orientation  
410 function assigned to each edge. The ends of each contig were annotated by their ID with a  
forward strand (+). Used this node concept, there were 4 types of edges in the graph, *i.e.*, (+, +)  
412 joining the forward strands of both contigs, (+, -) joining the forward strand of the first contig  
with the reversed strand of the second contig, (-, +) joining the reversed strand of the first contig  
414 with the forward strand of the second contig, and (-, -) joining the reversed strands of both  
contigs. After the edges-construction step, we accounted for the majority of the sequencing  
416 errors by removing all the edges that had a lower number of long reads than the threshold value.  
Once the edges were cleaned and filtered, we constructed an assembly graph  $G$ . We only added  
418 an edge to  $G$  if neither of the two nodes comprising the edge was present in  $G$ . In some cases,  $G$

contained some edges of transitive reduction, error-prone and tips. Thus, such edges were  
420 deleted and we got the final scaffold graph which we used for further analysis.

## 422 Construction of scaffolds

After the repeats identification and the graph simplification steps, most of the contigs were  
424 connected in linear stretches on the assembly graph. There were, however, some complex  
regions that required addition manipulation. We referred to a contig as a divergent node if it  
426 linked more than two nodes in the graph (Figure 3). We searched for unique nodes at the end of  
this complex region and got through this region if there were any long reads that joined two  
428 unique nodes. Otherwise, we stopped travelling the graph in the forward direction and switched  
to the reverse direction. Similarly, the search along the reverse direction of the graph stopped at  
430 the end of a linear stretch or at a divergent node. The process was then repeated using an  
unvisited node as the starting node. The procedure ended after traversing all the unvisited and  
432 unique nodes in the graph and outputted all linear paths. Finally, the gap-size between contigs  
was calculated. If the gap-size value was negative, the contigs were merged into a combined  
434 contig, and if the value was positive, a gap was inserted between the contigs (a gap was  
represented by one or more undefined 'N' nucleotides, depending on gap-size).

436

## Datasets

438 All tested data were downloaded from published and released datasets (See Table 1). The NGS  
data of *E. coli* (EAR000206) and *S. cerevisiae* (SRR527545 and SRR527546) were  
440 downloaded from EBI and NCBI, respectively, where the NGS data of *D. melanogaster* and *O.*

*sativa* were simulated from their latest reference genome using pIRS (version 1.11) with  
442 parameters -x 50 and -c 0, respectively. The SMRT long reads datasets for 5 organisms were  
published by PacBio®: SRX669475 and SRX533603 for *E. coli*, SRX533604 for *S. cerevisiae*,  
444 SRX499318 for *D. melanogaster*, SRR3743363 for *O. sativa*, and SAMN02744161 for *H.*  
*sapiens* (CHM1). We selected the first 20-fold coverage of each SMRT dataset for  
446 comprehensively assessing all scaffolders and we chose 3 different coverages, *i.e.* 1, 5 and 10  
-fold, for 2 small genomes (*E. coli* and *S. cerevisiae*) to test all scaffolders performances on  
448 lower depths. For the long reads of the ONT dataset, datasets were referred to LINKS and *H.*  
*sapiens* (NA12878) with ONT-FULL (ERX708228) for *E. coli*, ONT-ALL (ERX708228) for *E.*  
450 *coli*, ONT-RAW (ERX708228) for *E. coli*, ONT-NANOCORR (SRP055987) for *S. cerevisiae*,  
ONT-RAW (SRP055987) for *S. cerevisiae* and PRJEB23027 for *H. sapiens*, respectively.

452

### Draft assembly procedure

454 The draft genomes for *E. coli*, *S. cerevisiae*, *D. melanogaster* and *O. sativa* were constructed  
using SOAPdenovo2 taking genome size and contiguity into account. We use two subroutines  
456 for *E. coli*: 1) pregraph with -k 51 and -R parameters and 2) contig with -R parameter. We  
used two similar subroutines for *S. cerevisiae*: 1) pregraph with -k 29 and -R parameters and  
458 2) contig with -R parameter. The draft assemblies for *D. melanogaster* was also constructed  
using two subroutines: 1) pregraph with -k 61 and -R parameters and 2) contig with -R  
460 parameter. For *O. sativa*, we used the subroutine all with -K 63 -p 24 -d 1 -R -F. The two  
small genomes (*E. coli* and *S. cerevisiae*) were also assembled by SPAdes with the “careful”  
462 parameter. To assess the performances between LINKS and the other scaffolders on the ONT

long read, the draft assemblies for *E. coli* and *S. cerevisiae* were referred to LINKS. The *H.*

464 *sapiens* CHM1 and NA12878 draft assemblies were from Steinberg *et al.* [31] and Weisenfeld  
*et al.* [32]. Table 2 lists the statistics for all of the draft assemblies.

466

## System

468 All analysis was performed on a 1 Tb memory Linux machine with 48 CPUs incorporating  
Hyper-threading technology.

470

## Source code

472 LRScf is written in Java™ and is capable of running on all platforms including Linux,  
Windows, and Mac if Java Running Environment (JRE) was installed. The source code is  
474 available on GitHub (<https://github.com/shingocat/lrscaf>). We provide a packaged jar file  
which could be used straight out of the box and the compilation steps for advanced users.

476

## Additional file

478 Additional file 1: Long Reads (< 30 Kb) Distribution of Pacific Biosciences® SMRT, and  
Additional file 2: Long Reads (<30 Kb) Distribution of Oxford Nanopore Technologies®  
480 nanopore.

## 482 List of abbreviations

BLASR: Basic Local Alignment with Successive Refinement; NGS: Next Generation

484 Sequencing; TGS: Third Generation Sequencing; SMRT: Single Molecule Real Time; ONT:

Oxford Nanopore Technologies; LRScf: Long Reads Scaffolder

486

## Declarations

488 Ethics approval and consent to participate

Not applicable.

490

## Consent for publication

492 Not applicable.

494 Availability of data and materials

The datasets generated and/or analyzed in our study are available in the NCBI repository with  
496 accession number listed in Table 1. The datasets synthesized using pIRS are available from the  
corresponding author on request.

498

## Competing interests

500 The authors declare that they have no competing interests.

502 Funding

This research was funded by the Dapeng New District Special Fund for Industrial Development  
504 [KY20160204, KY20150113]; and the National Key Research and Development Program of  
China [2016YFC1200600]; and the National Natural Science Foundation of China [31571353];

506 and the Fundamental Research Funds for Central Non-profit Scientific Institution

[Y2016PT54]; and the Fund of Key Laboratory of Shenzhen [ZDSYS20141118170111640];

508 and the Agricultural Science and Technology Innovation Program; and the Shenzhen Science  
and Technology Research Funding [JSGG20160429104101251]; and the Key Forestry Public  
510 Welfare Project [201504105]; and the Agricultural Science and Technology Innovation  
Program Cooperation and Innovation Mission [CAAS-XTCX2016].

512

### Authors' Contributions

514 MQ conceived and implemented the method. MQ, ALL, FLZ and HF analyze SMRT dataset  
characters. MQ, SGW, and LLD analyze ONT dataset characters. MQ wrote the article. YXC  
516 and JR supervised the study. All authors read and approved the final manuscript.

### 518 Acknowledgments

We would like to thank anonymous reviewers for their comments in revising the manuscript.

520

### Author details

522 Genome Analysis Laboratory of the Ministry of Agriculture, Agricultural Genomics Institute at  
Shenzhen, Chinese Academy of Agricultural Sciences, No. 7, Pengfei Road, Dapeng District,  
524 Shenzhen, China.

### 526 References

1. Miller JR, Koren S, Sutton G. Assembly algorithms for next-generation sequencing data. *Genomics*.  
528 2010;95:315–27.



2. Gnerre S, MacCallum I, Przybylski D, Ribeiro FJ, Burton JN, Walker BJ, et al. High-quality draft  
530 assemblies of mammalian genomes from massively parallel sequence data. *Proc. Natl. Acad. Sci.*  
2011;108:1513–8.
- 532 3. Huson DH, Reinert K, Myers EW. The greedy path-merging algorithm for contig scaffolding. *J. ACM.*  
2002;49:603–15.
- 534 4. Pop M, Kosack DS, Salzberg SL. Hierarchical scaffolding with Bambus. *Genome Res.*  
2004;14:149–59.
- 536 5. Eid J, Fehr A, Gray J, Luong K, Lyle J, Otto G, et al. Real-time DNA sequencing from single  
polymerase molecules. *Science.* 2009;323:133–8.
- 538 6. Jain M, Koren S, Miga KH, Quick J, Rand AC, Sasani TA, et al. Nanopore sequencing and assembly  
of a human genome with ultra-long reads. *Nat. Biotechnol.* 2018;36:338–45.
- 540 7. Chin CS, Alexander DH, Marks P, Klammer AA, Drake J, Heiner C, et al. Nonhybrid, finished  
microbial genome assemblies from long-read SMRT sequencing data. *Nat. Methods.* 2013;10:563–9.
- 542 8. English AC, Richards S, Han Y, Wang M, Vee V, Qu J, et al. Mind the Gap: Upgrading Genomes with  
Pacific Biosciences RS Long-Read Sequencing Technology. *PLoS One.* 2012;7:1–12.
- 544 9. Chateau A, Giroudeau R. A complexity and approximation framework for the maximization  
scaffolding problem. *Theor. Comput. Sci.* 2015;595:92–106.
- 546 10. Salmela L, Mäkinen V, Välimäki N, Ylinen J, Ukkonen E. Fast scaffolding with small independent  
mixed integer programs. *Bioinformatics.* 2011;27:3259–65.
- 548 11. Sequences HP. Opera $\square$ : Reconstructing Optimal Genomic Scaffolds. *J. Comput. Biol.*  
2011;18:1681–91.
- 550 12. Donmez N, Brudno M. SCARPA: Scaffolding reads with practical algorithms. *Bioinformatics.*

- 2013;29:428–34.
- 552 13. Dayarian A, Michael TP, Sengupta AM. SOPRA: Scaffolding algorithm for paired reads via  
statistical optimization. *BMC Bioinformatics*. 2010;11:345.
- 554 14. Boetzer M, Henkel C V., Jansen HJ, Butler D, Pirovano W. Scaffolding pre-assembled contigs using  
SSPACE. *Bioinformatics*. 2011;27:578–9.
- 556 15. Sahlin K, Vezzi F, Nystedt B, Lundeberg J, Arvestad L. BESST - Efficient scaffolding of large  
fragmented assemblies. *BMC Bioinformatics*. 2014;15:281.
- 558 16. Luo J, Wang J, Zhang Z, Li M, Wu FX. BOSS: A novel scaffolding algorithm based on an optimized  
scaffold graph. *Bioinformatics*. 2017;33:169–76.
- 560 17. Hunt M, Newbold C, Berriman M, Otto TD. A comprehensive evaluation of assembly scaffolding  
tools. *Genome Biol*. 2014;15:R42.
- 562 18. Bashir A, Klammer AA, Robins WP, Chin C-S, Webster D, Paxinos E, et al. A hybrid approach for  
the automated finishing of bacterial genomes. *Nat. Biotechnol*. 2012;30:701–7.
- 564 19. Chaisson MJ, Tesler G. Mapping single molecule sequencing reads using basic local alignment with  
successive refinement (BLASR): Application and theory. *BMC Bioinformatics*. 2012;13:238.
- 566 20. Li H. Minimap and miniasm: Fast mapping and de novo assembly for noisy long sequences.  
*Bioinformatics*. 2016;32:2103–10.
- 568 21. Li H. Minimap2: pairwise alignment for nucleotide sequences. *Bioinformatics*. 2018;1–7.
- 570 22. Boetzer M, Pirovano W. SSPACE-LongRead: Scaffolding bacterial draft genomes using long read  
sequence information. *BMC Bioinformatics*. 2014;15:211.
- 572 23. Warren RL, Yang C, Vandervalk BP, Behsaz B, Lagman A, Jones SJM, et al. LINKS: Scalable,  
alignment-free scaffolding of draft genomes with long reads. *Gigascience*. 2015;4:35.

24. Gao S, Bertrand D, Chia BKH, Nagarajan N. OPERA-LG: Efficient and exact scaffolding of large,  
574 repeat-rich eukaryotic genomes with performance guarantees. *Genome Biol.* 2016;17:102.
25. Cao MD, Nguyen SH, Ganesamoorthy D, Elliott AG, Cooper MA, Coin LJM. Scaffolding and  
576 completing genome assemblies in real-time with nanopore sequencing. *Nat. Commun.* 2017;8:1–10.
26. Ye C, Hill CM, Wu S, Ruan J, Ma Z. DBG2OLC: Efficient assembly of large genomes using long  
578 erroneous reads of the third generation sequencing technologies. *Sci. Rep.* 2016;6:31900.
27. Wick RR, Judd LM, Gorrie CL, Holt KE. Unicycler: Resolving bacterial genome assemblies from  
580 short and long sequencing reads. *PLoS Comput. Biol.* 2017;13:1–22.
28. Hu X, Yuan J, Shi Y, Lu J, Liu B, Li Z, et al. pIRS: Profile-based illumina pair-end reads simulator.  
582 *Bioinformatics.* 2012;28:1533–5.
29. Luo R, Liu B, Xie Y, Li Z, Huang W, Yuan J, et al. SOAPdenovo2: an empirically improved memory  
584 efficient short-read de novo assembler. *Gigascience.* 2012;1:18.
30. Bankevich A, Nurk S, Antipov D, Gurevich AA, Dvorkin M, Kulikov AS, et al. SPAdes: A New  
586 Genome Assembly Algorithm and Its Applications to Single-Cell Sequencing. *J. Comput. Biol.*  
2012;19:455–77.
31. Steinberg KM, Schneider VA, Graves-Lindsay TA, Fulton RS, Agarwala R, Huddleston J, et al.  
588 Single haplotype assembly of the human genome from a hydatidiform mole. *Genome Res.*  
590 2014;24:2066–76.
32. Weisenfeld NI, Yin S, Sharpe T, Lau B, Hegarty R, Holmes L, et al. Comprehensive variation  
592 discovery in single human genomes. *Nat. Genet.* 2014;46:1350–5.
33. Ghurye J, Pop M, Koren S, Bickhart D, Chin CS. Scaffolding of long read assemblies using long  
594 range contact information. *BMC Genomics.* 2017;18:527.

34. Saha S, Rajasekaran S. Efficient and scalable scaffolding using optical restriction maps. *BMC*  
596 *Genomics*. 2014;15:S5.
35. Chin CS, Peluso P, Sedlazeck FJ, Nattestad M, Concepcion GT, Clum A, et al. Phased diploid  
598 genome assembly with single-molecule real-time sequencing. *Nat. Methods*. 2016;13:1050–4.
36. Gurevich A, Saveliev V, Vyahhi N, Tesler G. QUASt: Quality assessment tool for genome  
600 assemblies. *Bioinformatics*. 2013;29:1072–5.
37. Li H, Durbin R. Fast and accurate long-read alignment with Burrows-Wheeler transform.  
602 *Bioinformatics*. 2010;26:589–95.
38. Salzberg SL, Yorke JA. Beware of mis-assembled genomes. *Bioinformatics*. 2005;21:4320–1.
- 604 39. Muggli MD, Puglisi SJ, Ronen R, Boucher C. Misassembly detection using paired-end sequence  
reads and optical mapping data. *Bioinformatics*. 2015;31:i80–8.
- 606 40. Robinson GE, Hackett KJ, Purcell-Miramontes M, Brown SJ, Evans JD, Goldsmith MR, et al.  
Creating a buzz about insect genomes. *Science*. 2011;331:1386.
- 608 41. Zhang G. Genomics: Bird sequencing project takes off. *Nature*. 2015;522:34.

610

612

614

616

618

620

Figure 1. A validating model of alignment. The P1 and P2 are the two points for breaking a long  
622 read into 3 regions (R1, R2, and R3).

Figure 2. The construction of link using a long read *lri* and two contigs  $c_i$  and  $c_j$ . a) a basic  
624 schematic for a long read building link between contigs; b) the distance distribution of links.

Figure 3. The schematic illustration for travelling complex region.

626 Table 1. Descriptive statistics of datasets used for the comparative study.

Table 2. The statistics of draft assembly for *E. coli*, *S. cerevisiae*, *D. melanogaster*, *O. sativa*,  
628 and *H. sapiens*.

Table 3. The performances of scaffolders tested for *E. coli*, *S. cerevisiae*, *D. melanogaster*, *O.*  
630 *sativa*, and *H. sapiens* using PacBio long reads.

Table 4. The performances of scaffolders tested for *E. coli*, *S. cerevisiae*, and *H. sapiens* using  
632 ONT long reads.

Supplementary Table 1. The performances for *E. coli* and *S. cerevisiae* based on draft  
634 assemblies generated by SOAPdenovo2 and SPAdes using 1, 5, and 10 -fold coverages of  
PacBio long reads.

636 Supplementary Table 2. The performances for *E. coli* and *S. cerevisiae* based on draft  
assemblies generated by SOAPdenovo2 using 20-fold coverage of PacBio long reads.

638 Additional file 1: Pacific Biosciences SMRT long reads (< 30 Kb) distribution.

Additional file 2: Oxford Nanopore Technologies long reads (< 30 Kb) distribution.

640

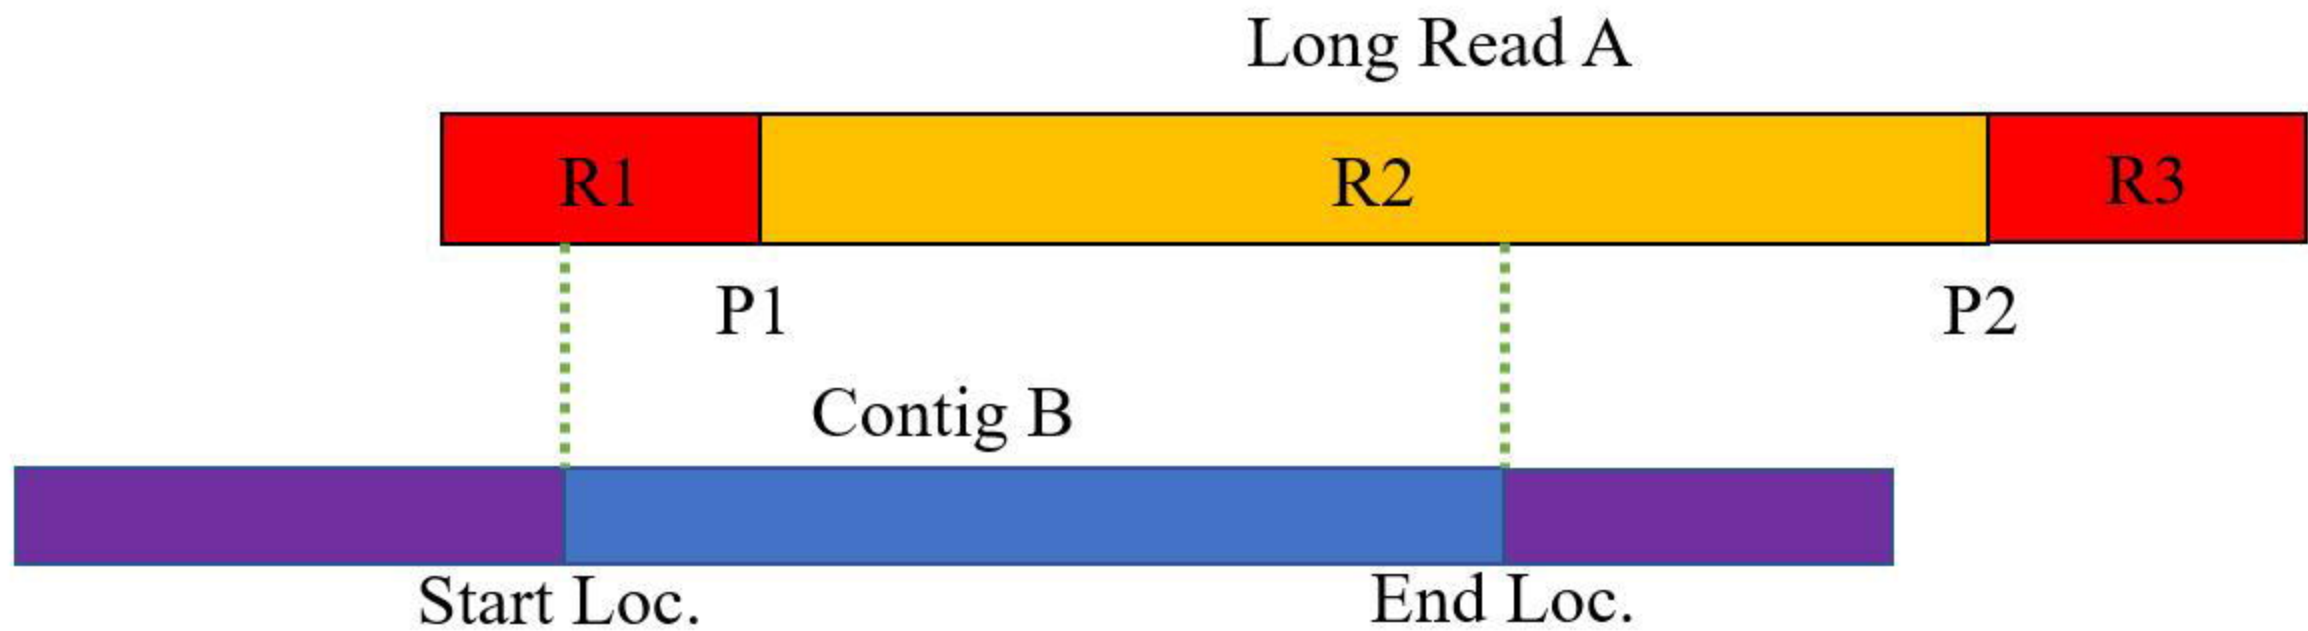

Figure 1. A validating model of alignment. The P1 and P2 are the two points for breaking a long read into 3 regions (R1, R2, and R3).

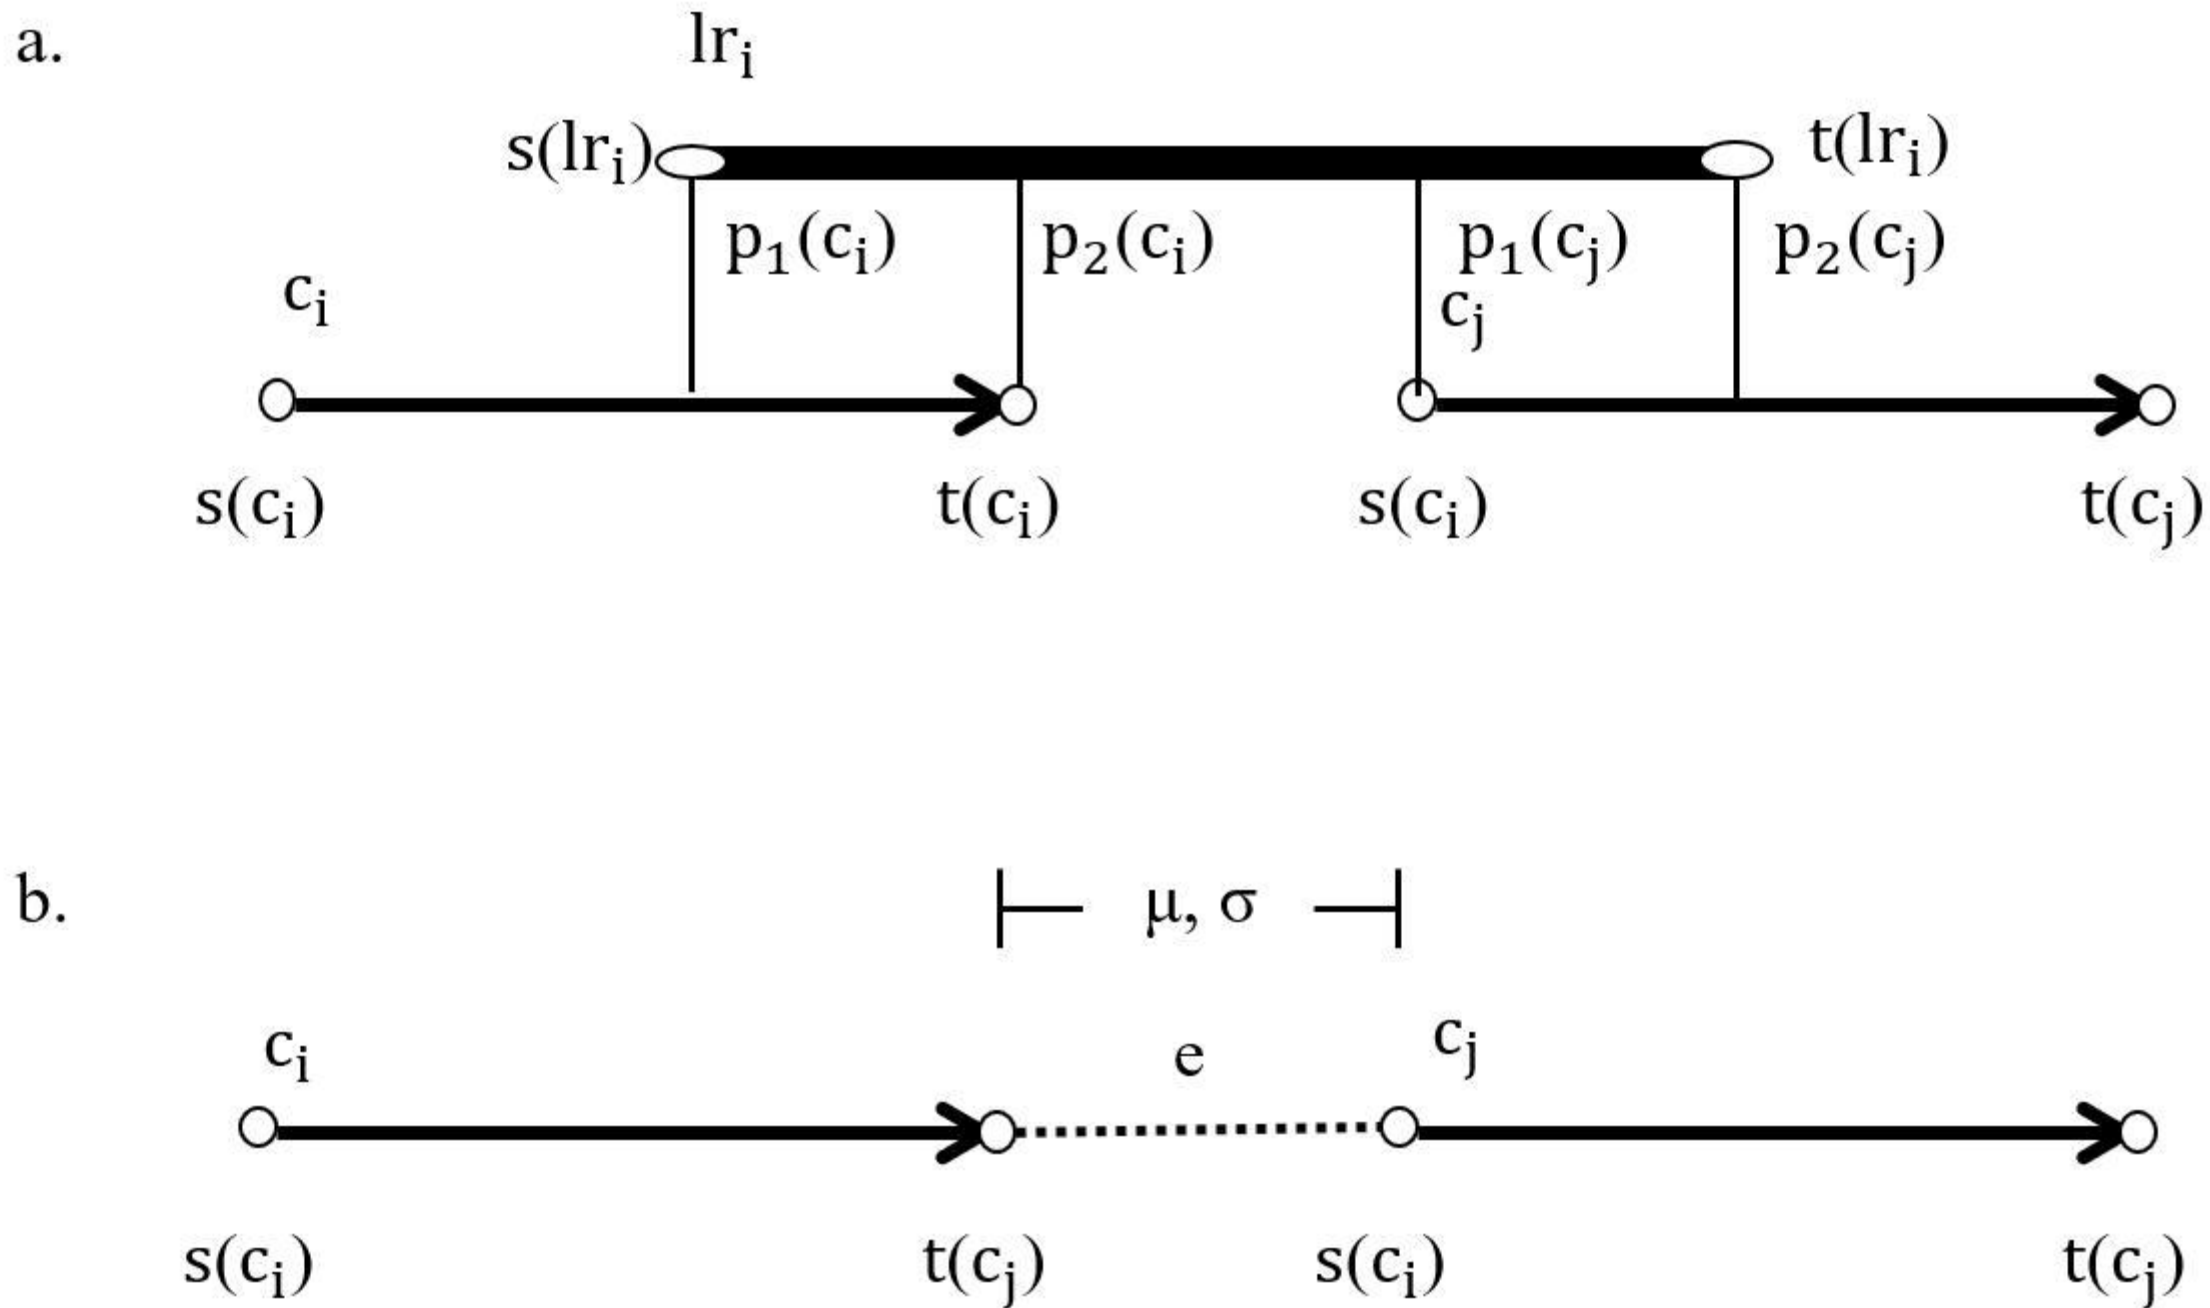

Figure 2. The construction of link using a long read  $lr_i$  and two contigs  $c_i$  and  $c_j$ ; a) a basic schematic for a long read building link between contigs; b) the distance distribution of links.



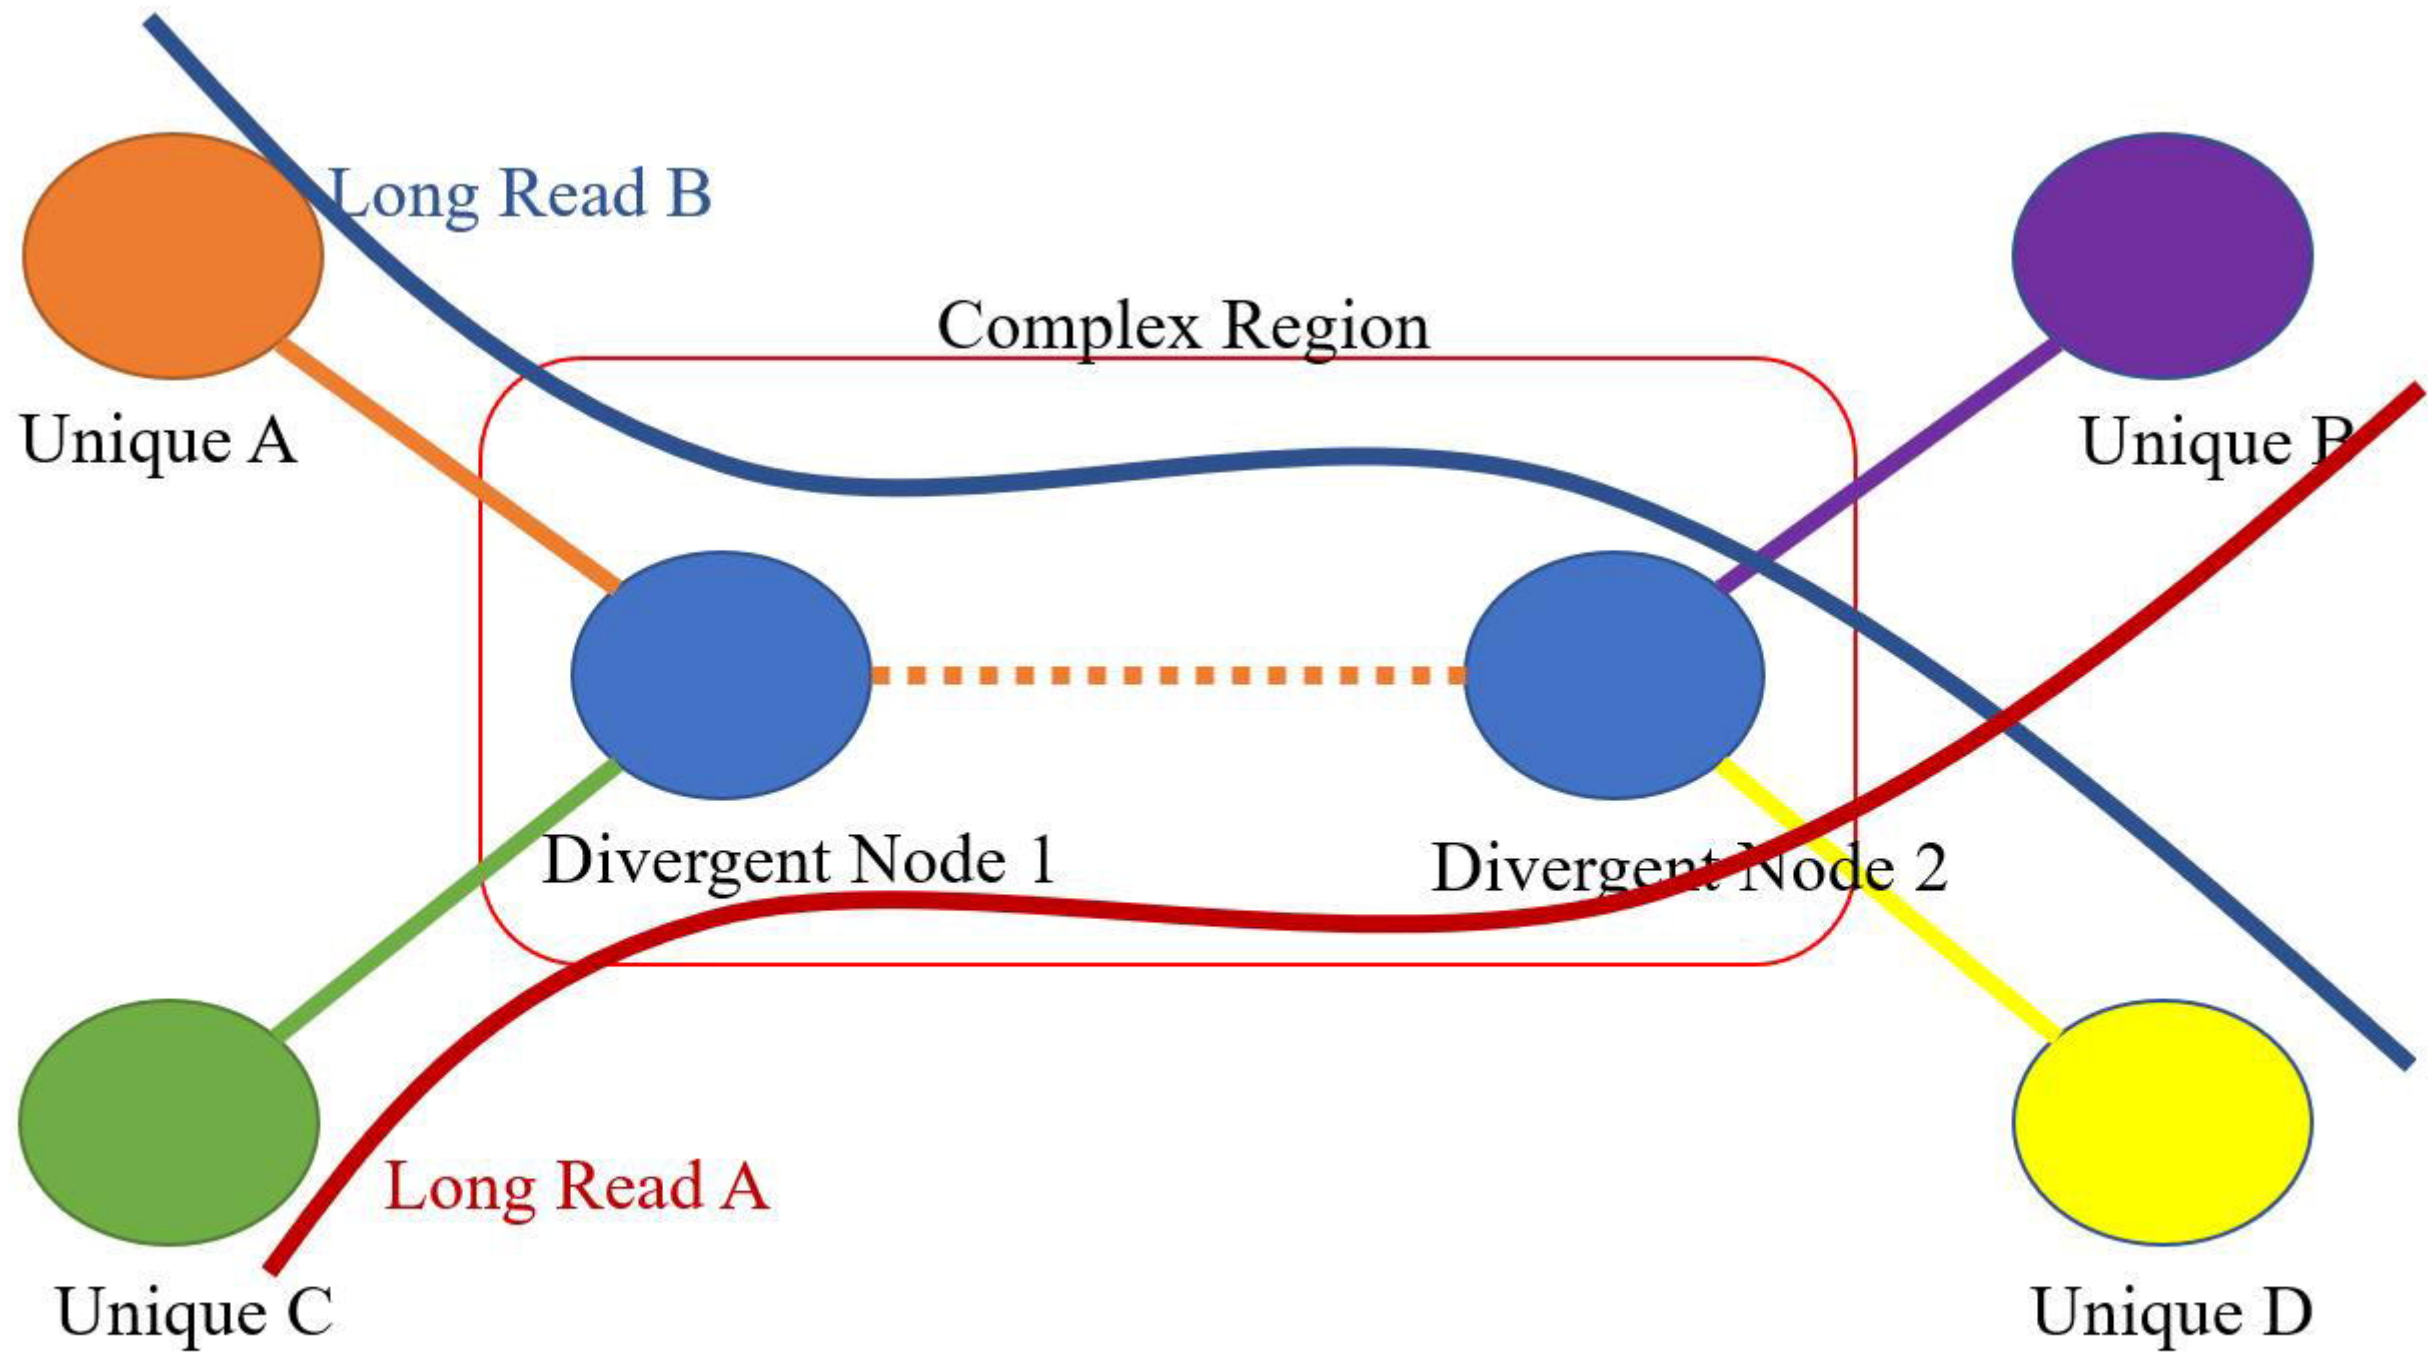

Figure 3. The schematic illustration for travelling complex region.

Table 1. Descriptive statistics of datasets used for the comparative study.

| Organism               | TYPE                      | Reads (#)   | Total bases (bp) | Coverage | Median (bp) | Longest (bp) | Source                 |
|------------------------|---------------------------|-------------|------------------|----------|-------------|--------------|------------------------|
| <i>E. coli</i>         | Illumina                  | 28,428,648  | 2,842,864,800    | 607.2 x  | 100         | 100          | ERA000206              |
|                        | PacBio                    | 9,291       | 93,994,356       | 20.1 x   | 8,712       | 41,331       | SRX669475; SRX533603   |
|                        | ONT-Full <sup>a</sup>     | 3,471       | 21,972,483       | 4.7 x    | 5,743       | 47,422       | ERX708228              |
|                        | ONT-Alt <sup>b</sup>      | 24,221      | 158,867,566      | 34.0 x   | 6,086       | 47,422       | ERX708228              |
|                        | ONT-Raw <sup>a</sup>      | 70,531      | 311,558,723      | 66.5 x   | 3,557       | 94,116       | ERX708228              |
| <i>S. cerevisiae</i>   | Illumina                  | 6,801,728   | 1,268,786,706    | 105.1 x  | 202         | 202          | SRR527545; SRR527546   |
|                        | PacBio                    | 44,786      | 249,319,042      | 20.7 x   | 4,554       | 27,575       | SRX533604              |
|                        | ONT-Nanocorr <sup>a</sup> | 88,218      | 526,588,732      | 43.6 x   | 5,512       | 72,879       | SRP055987              |
|                        | ONT-Raw <sup>a</sup>      | 407,761     | 2,392,848,698    | 198.2 x  | 5,059       | 191,145      | SRP055987              |
| <i>D. melanogaster</i> | Illumina                  | 60,190,770  | 6,019,077,000    | 50.0 x   | 100         | 100          | SYNTHESIS <sup>b</sup> |
|                        | PacBio                    | 127,403     | 2,271,687,745    | 18.9 x   | 19,577      | 33,581       | SRX499318              |
| <i>O. sativa</i>       | Illumina                  | 186,622,748 | 18,662,274,800   | 50.0 x   | 100         | 100          | SYNTHESIS <sup>b</sup> |
|                        | PacBio                    | 1,284,129   | 4,354,429,905    | 11.7 x   | 3,391       | 24,405       | SRR3743363             |
| <i>H. sapiens</i>      | PacBio                    | 10,245,649  | 59,999,995,767   | 20.0 x   | 1,569       | 208,628      | SAMN02744161           |
|                        | ONT                       | 15,599,452  | 114,380,310,980  | 35.0 x   | 4,569       | 1,537,349    | PRJEB23027             |

Note: <sup>a</sup> refer to LINKS dataset; <sup>b</sup> Synthesized by using pIRS (version 1.11) with parameters -x 50 and -c 0.

Table 2. Draft assembly statistics for *E. coli*, *S. cerevisiae*, *D. melanogaster*, *O. sativa*, and *H. sapiens*.

| Organism               | Source                       | Reference Length (bp) | Chr. | Assembled Length (bp) | Fraction | Contigs (#) | N00 (bp)  | N50 (bp) | N100 (bp) |
|------------------------|------------------------------|-----------------------|------|-----------------------|----------|-------------|-----------|----------|-----------|
| <i>E. coli</i>         | SOAPdenovo2                  | 4,681,865             | 1    | 4,598,322             | 0.98     | 728         | 164,235   | 40,009   | 52        |
|                        | SPAdes                       |                       |      | 4,579,398             | 0.98     | 242         | 264,985   | 133,189  | 56        |
|                        | ABYSS <sup>a</sup>           |                       |      | 5,160,631             | 1.10     | 69          | 358,719   | 177,636  | 493       |
| <i>S. cerevisiae</i>   | SOAPdenovo2                  | 12,071,326            | 16   | 12,063,232            | 0.99     | 6,961       | 146,672   | 19,567   | 60        |
|                        | SPAdes                       |                       |      | 11,754,316            | 0.97     | 2,254       | 451,383   | 107,906  | 56        |
|                        | Celera Assembly <sup>a</sup> |                       |      | 14,910,895            | 1.24     | 6,953       | 257,346   | 49,258   | 64        |
| <i>D. melanogaster</i> | SOAPdenovo2                  | 120,381,546           | 6    | 118,065,428           | 0.98     | 45,480      | 902,599   | 111,033  | 62        |
| <i>O. sativa</i>       | SOAPdenovo2                  | 373,245,519           | 12   | 346,168,844           | 0.93     | 257,801     | 147,060   | 18,977   | 3         |
| <i>H. sapiens</i>      | SRPRISM+ARGO <sup>b</sup>    | 2,996,426,293         | 23   | 2,781,084,252         | 0.93     | 40,906      | 1,009,096 | 140,502  | 199       |
|                        | DISCOVAR <sup>c</sup>        |                       |      | 3,068,057,564         | 1.02     | 858,918     | 1,380,479 | 179,783  | 201       |

Note: <sup>a</sup> refers to LINKS; <sup>b</sup> refers to [31]; <sup>c</sup> refers to [32].

Table 3. The performances of scaffolders tested for *E. coli*, *S. cerevisiae*, *D. melanogaster*, *O. sativa*, and *H. sapiens* using PacBio long reads.

| Organism                              | Methods              | Sequences (#)   | Sum              | NG50            | NA50            | Longest Sequence | Misassemblies (#) | CPU Time (min) | Peak RAM (Gb) |             |
|---------------------------------------|----------------------|-----------------|------------------|-----------------|-----------------|------------------|-------------------|----------------|---------------|-------------|
| <i>E. coli</i>                        | SPAdes               | 242             | 4.6 Mb           | 133.2 Kb        | 132.9 Kb        | 264.0 Kb         | 2                 | 196.28         | 0.02          |             |
|                                       | SSPACE-LongRead      | 164             | 4.7 Mb           | <b>4.6 Mb</b>   | 2.1 Mb          | <b>4.6 Mb</b>    | 2                 | 48.50          | -             |             |
|                                       | LINKS                | 183             | 4.6 Mb           | 0.4 Mb          | 0.2 Mb          | 1.3 Mb           | 13                | 9.40           | 20.01         |             |
|                                       | OPERA-LG             | 176             | 4.7 Mb           | 1.5 Mb          | 1.2 Mb          | 2.1 Mb           | 4                 | 361.79         | <b>0.01</b>   |             |
|                                       | SMIS                 | 185             | 4.7 Mb           | <b>4.6 Mb</b>   | <b>3.6 Mb</b>   | <b>4.6 Mb</b>    | 2                 | 26.51          | -             |             |
|                                       | npScaf               | 134             | 4.7 Mb           | 2.5 Mb          | 1.6 Mb          | 1.3 Mb           | 9                 | 4.49           | 1.71          |             |
|                                       | Unicycler            | 1               | 4.6 Mb           | <b>4.6 Mb</b>   | 2.7 Mb          | <b>4.6 Mb</b>    | <b>1</b>          | 7,378.72       | 3.28          |             |
|                                       | DBG2OLC              | 4               | 4.2 Mb           | 1.3 Mb          | 0.6 Mb          | 1.6 Mb           | 4                 | 2.32           | 0.17          |             |
|                                       | LRScf (BLASR)        | 173             | 4.8 Mb           | <b>4.6 Mb</b>   | 2.6 Mb          | <b>4.6 Mb</b>    | 2                 | 1.74           | 1.80          |             |
|                                       | LRScf (minimap)      | 173             | 4.8 Mb           | <b>4.6 Mb</b>   | 2.7 Mb          | <b>4.6 Mb</b>    | 2                 | <b>0.17</b>    | 0.25          |             |
|                                       | LRScf (minimap2)     | 173             | 4.8 Mb           | <b>4.6 Mb</b>   | 2.7 Mb          | <b>4.6 Mb</b>    | 2                 | 0.19           | 0.25          |             |
|                                       | <i>S. cerevisiae</i> | SPAdes          | 2,254            | 11.8 Mb         | 104.2 Kb        | 93.5 Kb          | 451.4 Kb          | 22             | 133.31        | 0.03        |
|                                       |                      | SSPACE-LongRead | 2,012            | 12.1 Mb         | 510.4 Kb        | 196.6 Kb         | <b>1.0 Mb</b>     | 75             | 108.05        | -           |
|                                       |                      | LINKS           | 2,057            | 11.8 Mb         | 260.2 Kb        | 161.9 Kb         | <b>1.0 Mb</b>     | 43             | 85.22         | 45.23       |
|                                       |                      | OPERA-LG        | 2,078            | 12.0 Mb         | 418.6 Kb        | 247.1 Kb         | <b>1.0 Mb</b>     | 41             | 12.10         | <b>0.01</b> |
| SMIS                                  |                      | 2,115           | 11.9 Mb          | 416.3 Kb        | 263.9 Kb        | 0.9 Mb           | 32                | 41.68          | -             |             |
| npScaf                                |                      | 1,868           | 11.9 Mb          | <b>665.8 Kb</b> | 202.1 Kb        | <b>1.0 Mb</b>    | 105               | 12.45          | 2.45          |             |
| Unicycler                             |                      | 62              | 11.5 Mb          | 326.1 Kb        | <b>284.1 Kb</b> | 0.8 Mb           | <b>17</b>         | 1,459.92       | 5.80          |             |
| DBG2OLC                               |                      | 38              | 7.5 Mb           | 172.2 Kb        | 174.5 Kb        | 0.7 Mb           | 24                | 16.90          | 0.42          |             |
| LRScf (BLASR)                         |                      | 2,063           | 12.7 Mb          | 440.0 Kb        | 260.9 Kb        | <b>1.0 Mb</b>    | 38                | 9.27           | 1.16          |             |
| LRScf (minimap)                       |                      | 2,109           | 12.3 Mb          | 421.3 Kb        | 283.0 Kb        | <b>1.0 Mb</b>    | 34                | 0.39           | 0.28          |             |
| LRScf (minimap2)                      |                      | 2,111           | 12.3 Mb          | 421.2 Kb        | 283.0 Kb        | <b>1.0 Mb</b>    | 33                | <b>0.34</b>    | 0.51          |             |
| <i>D. melanogaster</i>                |                      | SOAPdenovo2     | 45,480           | 118.1 Mb        | 107.8 Kb        | 111.0 Kb         | 902.6 Kb          | 0              | 23.15         | 43.00       |
|                                       |                      | SSPACE-LongRead | 42,136           | 124.1 Mb        | <b>6.6 Mb</b>   | 3.8 Mb           | <b>19.6 Mb</b>    | 83             | 3,703.10      | -           |
|                                       |                      | LINKS           | 42,976           | 119.0 Mb        | 0.3 Mb          | 0.3 Mb           | 1.4 Mb            | 480            | 766.27        | 675.37      |
|                                       |                      | OPERA-LG        | 42,543           | 123.5 Mb        | 3.7 Mb          | 2.6 Mb           | 19.2 Mb           | 211            | 130.21        | <b>0.12</b> |
|                                       | SMIS                 | 43,387          | 122.4 Mb         | 4.0 Mb          | 3.1 Mb          | 15.6 Mb          | 112               | 4,035.66       | -             |             |
|                                       | npScaf               | 41,657          | 120.9 Mb         | 5.1 Mb          | 0.3 Mb          | 11.8 Mb          | 1,515             | 37.20          | 15.26         |             |
|                                       | DBG2OLC              | 715             | 143.3 Mb         | 5.0 Mb          | 1.7 Mb          | 11.3 Mb          | 2,393             | 132.20         | 4.30          |             |
|                                       | LRScf (BLASR)        | 43,116          | 124.4 Mb         | 5.4 Mb          | <b>5.2 Mb</b>   | <b>19.6 Mb</b>   | <b>15</b>         | 32.19          | 1.46          |             |
|                                       | LRScf (minimap)      | 42,696          | 124.1 Mb         | 5.5 Mb          | 3.7 Mb          | 15.1 Mb          | 35                | 4.08           | 3.69          |             |
|                                       | LRScf (minimap2)     | 42,675          | 123.7 Mb         | 6.1 Mb          | 3.7 Mb          | 17.8 Mb          | 21                | <b>1.61</b>    | 3.72          |             |
|                                       | <i>O. sativa</i>     | SOAPdenovo2     | 257,770          | 346.2 Mb        | 17.2 Kb         | 19.0 Kb          | 147.1 Kb          | 45             | 206.92        | 147.23      |
|                                       |                      | SSPACE-LongRead | TLE <sup>b</sup> | TLE             | TLE             | TLE              | TLE               | TLE            | TLE           | TLE         |
|                                       |                      | LINKS           | 242,206          | 351.0 Mb        | 47.3 Kb         | 47.7 Kb          | 424.5 Kb          | 535            | 1,272.45      | 877.72      |
|                                       |                      | OPERA-LG        | 234,910          | 357.5 Mb        | 79.1 Kb         | 62.8 Kb          | 684.2 Kb          | 2,604          | 391.24        | <b>0.37</b> |
|                                       |                      | SMIS            | 238,851          | 352.6 Mb        | 55.1 Kb         | 50.3 Kb          | 423.8 Kb          | 944            | 8,040.56      | -           |
| npScaf                                |                      | 245,140         | 347.0 Mb         | 63.8 Kb         | 50.1 Kb         | 553.8 Kb         | 2,198             | 87.58          | 6.50          |             |
| DBG2OLC                               |                      | 5,759           | 331.3 Mb         | <b>94.5 Kb</b>  | <b>64.9 Kb</b>  | <b>794.7 Kb</b>  | 659               | 338.11         | 10.18         |             |
| LRScf (BLASR)                         |                      | 240,136         | 365.2 Mb         | 60.5 Kb         | 54.9 Kb         | 482.1 Kb         | 734               | 117.76         | 4.09          |             |
| LRScf (minimap)                       |                      | 240,054         | 362.7 Mb         | 53.4 Kb         | 49.6 Kb         | 426.4 Kb         | 803               | 13.46          | 4.48          |             |
| LRScf (minimap2)                      |                      | 240,857         | 362.7 Mb         | 54.3 Kb         | 51.3 Kb         | 459.9 Kb         | <b>455</b>        | <b>6.30</b>    | 4.14          |             |
| <i>H. sapiens</i> (CHM1) <sup>d</sup> |                      | SRPRISM-ARGO    | 35,120           | 2.8 Gb          | 127.5 Kb        | 140.5 Kb         | 1.0 Mb            | 106            | -             | -           |
|                                       |                      | SSPACE-LongRead | TLE              | TLE             | TLE             | TLE              | TLE               | TLE            | TLE           | TLE         |
|                                       |                      | LINKS           | MLE <sup>c</sup> | MLE             | MLE             | MLE              | MLE               | MLE            | MLE           | MLE         |
|                                       |                      | SMIS            | TLE              | TLE             | TLE             | TLE              | TLE               | TLE            | TLE           | TLE         |
|                                       |                      | npScaf          | TLE              | TLE             | TLE             | TLE              | TLE               | TLE            | TLE           | TLE         |
|                                       | DBG2OLC              | 3,932           | 1.2 Gb           | -               | 217.6 Kb        | 2.3 Mb           | 169               | 3,700.02       | 64.69         |             |
|                                       | LRScf (BLASR)        | 1,319           | 2.8 Gb           | 9.5 Mb          | 9.0 Mb          | 43.5 Mb          | <b>266</b>        | 2,701.48       | 27.23         |             |
|                                       | LRScf (minimap)      | 1,697           | 2.8 Gb           | 5.2 Mb          | 5.3 Mb          | 26.0 Mb          | 371               | 169.20         | 23.91         |             |
|                                       | LRScf (minimap2)     | 1,426           | 2.8 Gb           | <b>10.4 Mb</b>  | <b>10.7 Mb</b>  | <b>45.0 Mb</b>   | 292               | <b>47.49</b>   | <b>20.28</b>  |             |

Note: <sup>a</sup> is not available. <sup>b</sup> means that the run time is exceeded 3 weeks' time limit. <sup>c</sup> means that the memory usage is exceeded the capacity of system (1TB). <sup>d</sup> the assembly metrics are computed by QUAST\_dev\_5.0. The best genomic assembly metrics are highlighted in Bold.

Table 4. The performances of scaffolders tested for *E. coli*, *S. cerevisiae*, and *H. sapiens* using Nanopore long reads.

| Organism                            | Methods                                  | Sequences (#)                | Sum              | NG50            | NA50            | Longest Sequence  | Misassemblies (#) | CPU Time (min) | Peak RAM (Gb) |       |
|-------------------------------------|------------------------------------------|------------------------------|------------------|-----------------|-----------------|-------------------|-------------------|----------------|---------------|-------|
| <i>E. coli</i> <sup>FULL</sup>      | ABySS <sup>a</sup>                       | 69                           | 5.2 Mb           | 179.7 Kb        | 146.9 Kb        | 358.7 Kb          | 5                 | - <sup>b</sup> | -             |       |
|                                     | SSPACE-LongRead                          | 47                           | 5.2 Mb           | 226.7 Kb        | 204.3 Kb        | 628.4 Kb          | 6                 | 19.77          | -             |       |
|                                     | LINKS                                    | 51                           | 5.2 Mb           | 271.0 Kb        | 226.3 Kb        | 633.2 Kb          | 5                 | 1.06           | 2.10          |       |
|                                     | SMIS                                     | 38                           | 5.2 Mb           | 638.8 Kb        | 357.9 Kb        | 951.2 Kb          | 5                 | 247.62         | -             |       |
|                                     | npScarf                                  | 43                           | 5.2 Mb           | 344.8 Kb        | 229.6 Kb        | 632.9 Kb          | 6                 | 1.01           | 0.56          |       |
|                                     | DBG2OLC                                  | 3                            | 0.3 Mb           | -               | 188.5 Kb        | 206.8 Kb          | 0                 | 4.76           | 0.13          |       |
|                                     | LRScf (BLASR)                            | 30                           | 5.2 Mb           | <b>921.6 Kb</b> | <b>485.2 Kb</b> | <b>1,054.7 Kb</b> | 6                 | 0.57           | <b>0.28</b>   |       |
|                                     | LRScf (minimap)                          | 53                           | 5.2 Mb           | 226.7 Kb        | 204.3 Kb        | 611.5 Kb          | 5                 | 0.26           | 0.31          |       |
|                                     | LRScf (minimap2)                         | 44                           | 5.1 Mb           | 358.3 Kb        | 268.6 Kb        | 707.7 Kb          | 5                 | <b>0.15</b>    | 0.36          |       |
|                                     | <i>E. coli</i> <sup>ALL</sup>            | SSPACE-LongRead              | 45               | 5.2 Mb          | 226.7 Kb        | 226.3 Kb          | 406.8 Kb          | 5              | 135.70        | -     |
| LINKS                               |                                          | 43                           | 5.2 Mb           | 294.0 Kb        | 226.3 Kb        | 633.2 Kb          | 5                 | 6.78           | 14.23         |       |
| SMIS                                |                                          | 27                           | 5.2 Mb           | <b>992.2 Kb</b> | <b>618.4 Kb</b> | <b>1,152.8 Kb</b> | 5                 | 43.08          | -             |       |
| npScarf                             |                                          | 33                           | 5.2 Mb           | 454.2 Kb        | 344.7 Kb        | 838.1 Kb          | 8                 | 5.18           | 1.22          |       |
| DBG2OLC                             |                                          | 4                            | 0.5 Mb           | -               | 59.2 Kb         | 209.0 kb          | 1                 | 5.58           | 0.13          |       |
| LRScf (BLASR)                       |                                          | 20                           | 5.0 Mb           | 987.4 Kb        | 616.9 Kb        | 1,147.7 Kb        | 5                 | 1.27           | 0.36          |       |
| LRScf (minimap)                     |                                          | 33                           | 5.0 Mb           | 487.3 Kb        | 270.3 Kb        | 762.7 Kb          | 5                 | <b>0.19</b>    | <b>0.28</b>   |       |
| LRScf (minimap2)                    |                                          | 24                           | 5.2 Mb           | 693.8 Kb        | 357.9 Kb        | 1,147.7 Kb        | 5                 | 0.34           | 0.46          |       |
| SSPACE-LongRead                     |                                          | 44                           | 5.2 Mb           | 239.0 Kb        | 226.3 Kb        | 628.2 Kb          | 5                 | 193.27         | -             |       |
| LINKS                               |                                          | 48                           | 5.2 Mb           | 267.0 Kb        | 205.5 Kb        | 633.2 Kb          | 5                 | 12.26          | 21.94         |       |
| <i>E. coli</i> <sup>RAW</sup>       | SMIS                                     | 26                           | 5.2 Mb           | <b>928.1 Kb</b> | <b>879.1 Kb</b> | <b>1,152.5 Kb</b> | 6                 | 82.22          | -             |       |
|                                     | npScarf                                  | 28                           | 5.2 Mb           | 762.8 Kb        | 616.8 Kb        | 1,146.8 Kb        | 6                 | 12.65          | 2.06          |       |
|                                     | DBG2OLC                                  | 3                            | 0.2 Mb           | -               | 9.8 Kb          | 106. Kb           | 0                 | 10.49          | 0.13          |       |
|                                     | LRScf (BLASR)                            | 34                           | 5.5 Mb           | 922.5 Kb        | 616.5 Kb        | 1,147.2 Kb        | 6                 | 4.18           | <b>0.32</b>   |       |
|                                     | LRScf (minimap)                          | 35                           | 5.2 Mb           | 358.3 Kb        | 270.3 Kb        | 610.4 Kb          | 6                 | <b>0.32</b>    | 0.35          |       |
|                                     | LRScf (minimap2)                         | 36                           | 5.2 Mb           | 445.1 Kb        | 357.9 Kb        | 922.6 Kb          | 5                 | <b>0.32</b>    | 0.29          |       |
|                                     | <i>S. cerevisiae</i> <sup>NANOCORR</sup> | Celera Assembly <sup>g</sup> | 6,953            | 14.9 Mb         | 58.8 Kb         | 46.4 Kb           | 257.3 Kb          | 19             | -             | -     |
|                                     |                                          | SSPACE-LongRead              | 6,353            | 15.7 Mb         | 231.4 Kb        | 132.9 Kb          | 733.3 Kb          | 50             | 454.82        | -     |
|                                     |                                          | LINKS                        | 6,651            | 15.1 Mb         | 235.5 Kb        | 110.6 Kb          | 623.1 Kb          | 55             | 50.25         | 51.73 |
|                                     |                                          | SMIS                         | 6,706            | 15.1 Mb         | 470.5 Kb        | <b>250.7 Kb</b>   | 1,094.4 Kb        | <b>28</b>      | 293.07        | -     |
| npScarf                             |                                          | 6,649                        | 15.1 Mb          | <b>559.4 Kb</b> | 219.9 Kb        | <b>1,474.2 Kb</b> | 65                | 7.23           | 3.26          |       |
| DBG2OLC                             |                                          | 75                           | 8.4 Mb           | 139.2 Kb        | 143.1 Kb        | 490.8 Kb          | 76                | 20.76          | 0.48          |       |
| LRScf (BLASR)                       |                                          | 6,338                        | 15.3 Mb          | 231.4 Kb        | 137.7 Kb        | 761.5 Kb          | 39                | 4.95           | <b>0.46</b>   |       |
| LRScf (minimap)                     |                                          | 6,678                        | 15.7 Mb          | 261.5 Kb        | 144.7 Kb        | 741.5 Kb          | 41                | <b>1.40</b>    | 1.34          |       |
| LRScf (minimap2)                    |                                          | 6,435                        | 16.3 Mb          | 445.1 Kb        | 189.0 Kb        | 764.9 Kb          | 39                | 6.03           | 0.96          |       |
| SSPACE-LongRead                     |                                          | 5,914                        | 17.8 Mb          | 239.0 Kb        | 99.8 Kb         | 1,086.8 Kb        | 147               | 1,563.55       | -             |       |
| <i>S. cerevisiae</i> <sup>RAW</sup> | LINKS                                    | 6,680                        | 15.0 Mb          | 231.8 Kb        | 159.7 Kb        | 737.2 Kb          | 26                | 98.64          | 153.46        |       |
|                                     | SMIS                                     | 6,696                        | 15.1 Mb          | 438.2 Kb        | 205.7 Kb        | 1,094.8 Kb        | 35                | 1,100.18       | -             |       |
|                                     | npScarf                                  | 6,629                        | 15.1 Mb          | <b>578.3 Kb</b> | <b>250.0 Kb</b> | <b>1,566.3 Kb</b> | 48                | 369.20         | 8.57          |       |
|                                     | DBG2OLC                                  | 215                          | 13.0 Mb          | 465.7 Kb        | 155.0 Kb        | 1,230.4 Kb        | 30                | 111.55         | 0.48          |       |
|                                     | LRScf (BLASR)                            | 6,347                        | 15.6 Mb          | 318.9 Kb        | 199.7 Kb        | 750.8 Kb          | 29                | 29.29          | <b>0.37</b>   |       |
|                                     | LRScf (minimap)                          | 6,719                        | 15.8 Mb          | 375.0 Kb        | 177.4 Kb        | 753.2 Kb          | 37                | <b>1.11</b>    | 1.01          |       |
|                                     | LRScf (minimap2)                         | 6,498                        | 15.1 Mb          | 253.8 Kb        | 168.6 Kb        | 752.6 Kb          | <b>23</b>         | 1.75           | 0.75          |       |
|                                     | <i>H. sapiens</i> (NA12878) <sup>f</sup> | DISCOVAR                     | 43,541           | 2.8 Gb          | 115.7 Kb        | 127.3 Kb          | 961.2 Kb          | 336            | -             | -     |
|                                     |                                          | SSPACE-LongRead              | TLE <sup>c</sup> | TLE             | TLE             | TLE               | TLE               | TLE            | TLE           | TLE   |
|                                     |                                          | LINKS                        | MLE <sup>d</sup> | MLE             | MLE             | MLE               | MLE               | MLE            | MLE           | MLE   |
| SMIS                                |                                          | TLE                          | TLE              | TLE             | TLE             | TLE               | TLE               | TLE            | TLE           |       |
| npScarf                             |                                          | TLE                          | TLE              | TLE             | TLE             | TLE               | TLE               | TLE            | TLE           |       |
| DBG2OLC                             |                                          | 10                           | 29.3 Mb          | -               | -               | 16.6 Mb           | 0                 | 5,483.93       | 69.84         |       |
| LRScf (BLASR)                       |                                          | 2,412                        | 2.9 Gb           | 16.5 Mb         | 11.7 Mb         | <b>71.6 Mb</b>    | 856               | 1,323.26       | <b>41.20</b>  |       |
| LRScf (minimap)                     |                                          | 3,182                        | 2.9 Gb           | 12.2 Mb         | 10.1 Mb         | 49.4 Mb           | <b>720</b>        | 377.63         | 78.89         |       |
| LRScf (minimap2)                    |                                          | 2,462                        | 2.9 Gb           | <b>17.4 Mb</b>  | <b>13.6 Mb</b>  | 64.2 Mb           | 785               | <b>127.07</b>  | 62.56         |       |

Note: <sup>a</sup> refers to LINKS dataset; <sup>b</sup> is not available. <sup>c</sup> means the run time is exceeded 3 weeks' time limit. <sup>d</sup> means that the memory usage is exceeded the capacity of system (1TB).

<sup>e</sup> the assembly metrics are computed by QUAST\_dev\_5.0. The best genomic assembly metrics are highlighted in Bold.
